# Supplementary material
Source: PubMed Central journal article supplement (PMC3497856)
Supplement: bm301283f_si_001.pdf [file bm301283f_si_001.pdf]

Supporting Information for:

Normal and shear interactions between hyaluronan-  
aggrecan complexes mimicking possible boundary  
lubricants in articular cartilage in synovial joints

Jasmine Seror<sup>1</sup>, Yulia Merkher<sup>2</sup>, Nir Kampf<sup>1</sup>, Lisa Collinson<sup>3</sup>, Anthony J. Day<sup>3</sup>, Alice Maroudas<sup>2</sup>  
and Jacob Klein<sup>1\*</sup>

<sup>1</sup>Department of Materials and Interfaces, Weizmann Institute of Science, Rehovot, 76100, Israel

<sup>2</sup>Department of Biomedical Engineering, Technion Institute of Technology, Haifa 32000, Israel

<sup>3</sup>Wellcome Trust Center for Cell-Matrix Research, Faculty of Life Sciences, University of  
Manchester, Oxford Road, Manchester M13 9PT, UK

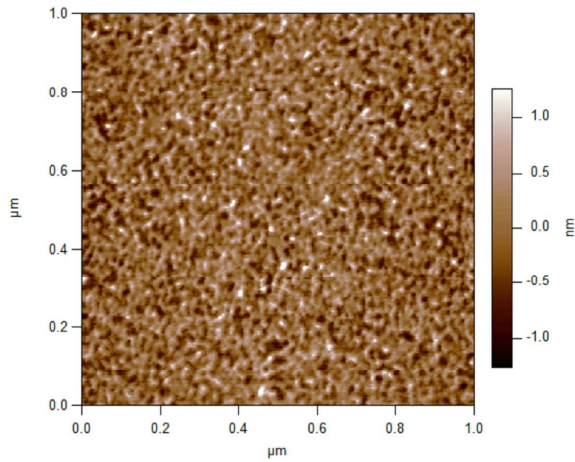

**Figure 1.** AFM image of a mica surface covered with avidin. A freshly cleaved mica sheet was soaked in 0.01 mg/ml avidin aqueous solution for 30 minutes, rinsed in pure water for 1-2 minutes and left drying in the laminar hood. Tapping mode in air, MFP3D Asylum Research instrument.

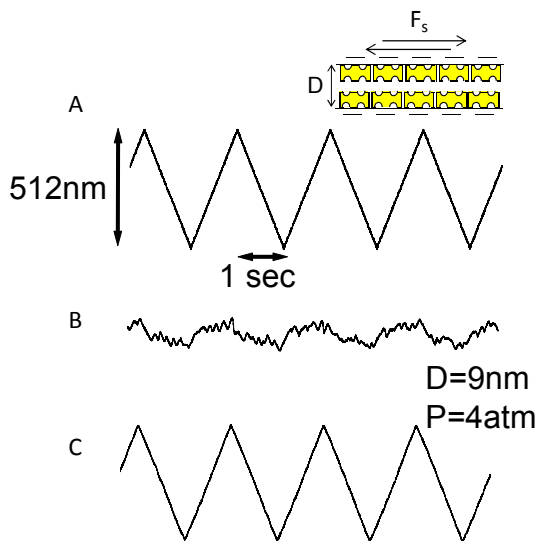

**Figure 2.** Shear Force vs. time traces between two avidin-bearing mica surfaces. Trace A: back and forth motion of the upper lens on top of the lower one, traces B-C shear forces recorded by the bending of the lateral springs at different surface separations and pressures.
